# Supplementary material for: Delineation of Steroid-Degrading Microorganisms through Comparative Genomic Analysis
Source: PubMed Central journal article supplement (PMC4810484; doi:10.1128/mbio.00166-16), 2016-03-08

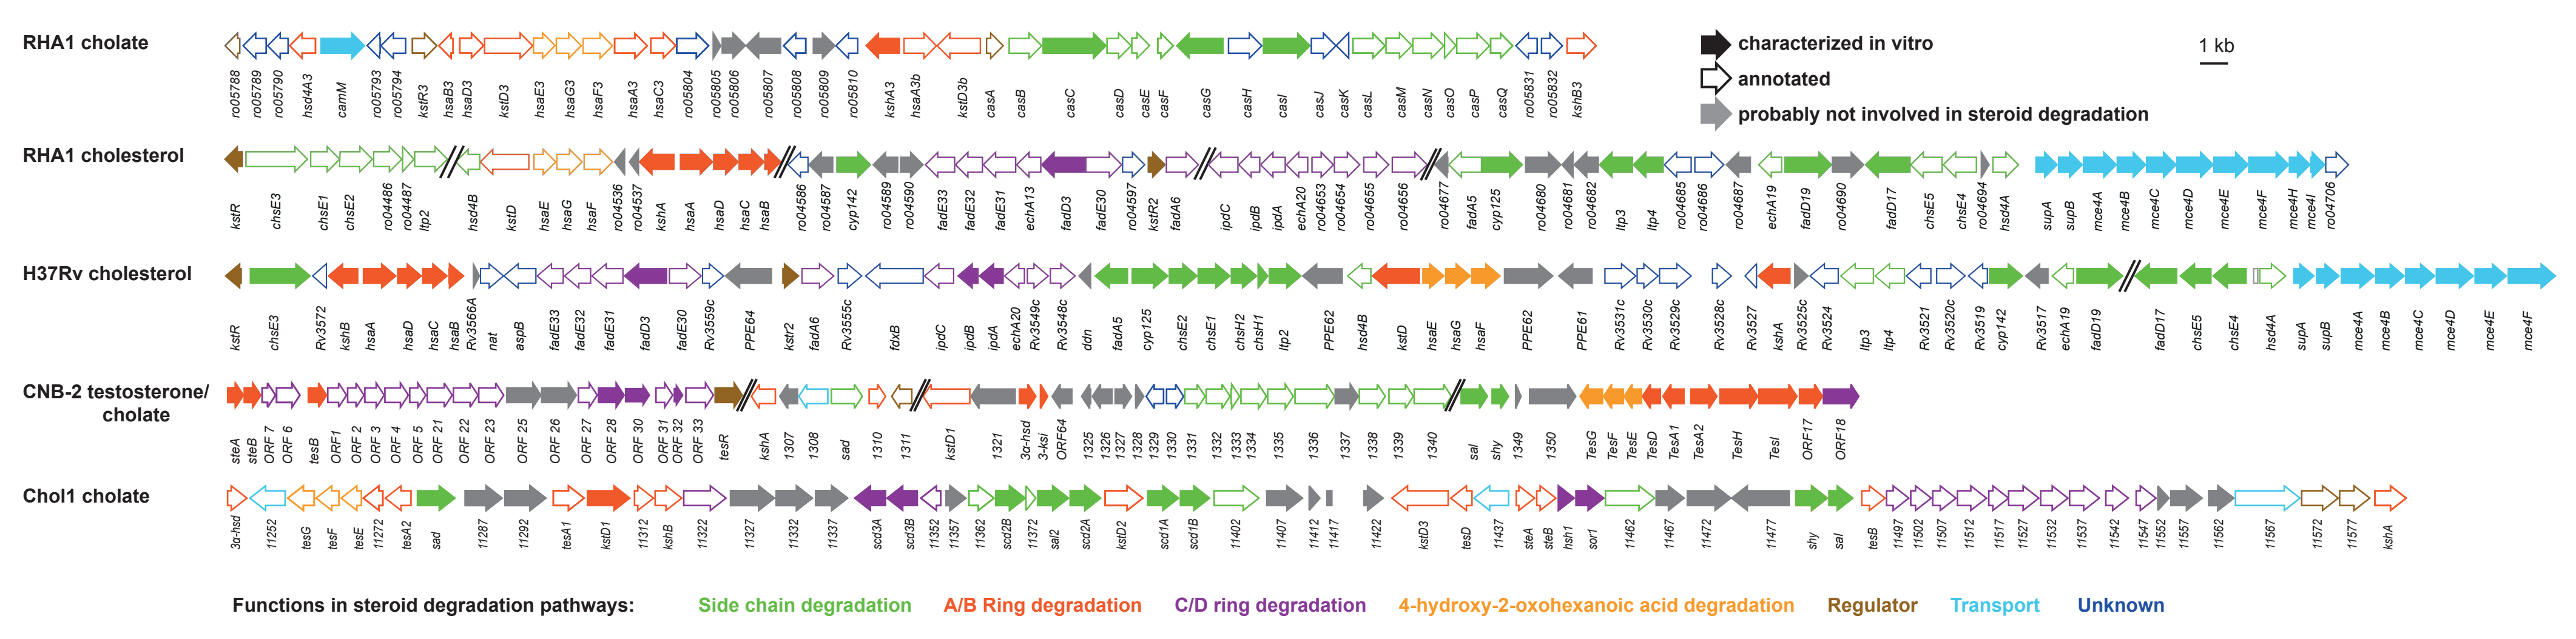

Supplement: mbo001162715sf1.pdf [file mbo001162715sf1.pdf]
