# Supplementary material for: Delineation of Steroid-Degrading Microorganisms through Comparative Genomic Analysis
Source: PubMed Central journal article supplement (PMC4810484; doi:10.1128/mbio.00166-16), 2016-03-08
Supplement: mbo001162715sf3.pdf [file mbo001162715sf3.pdf]

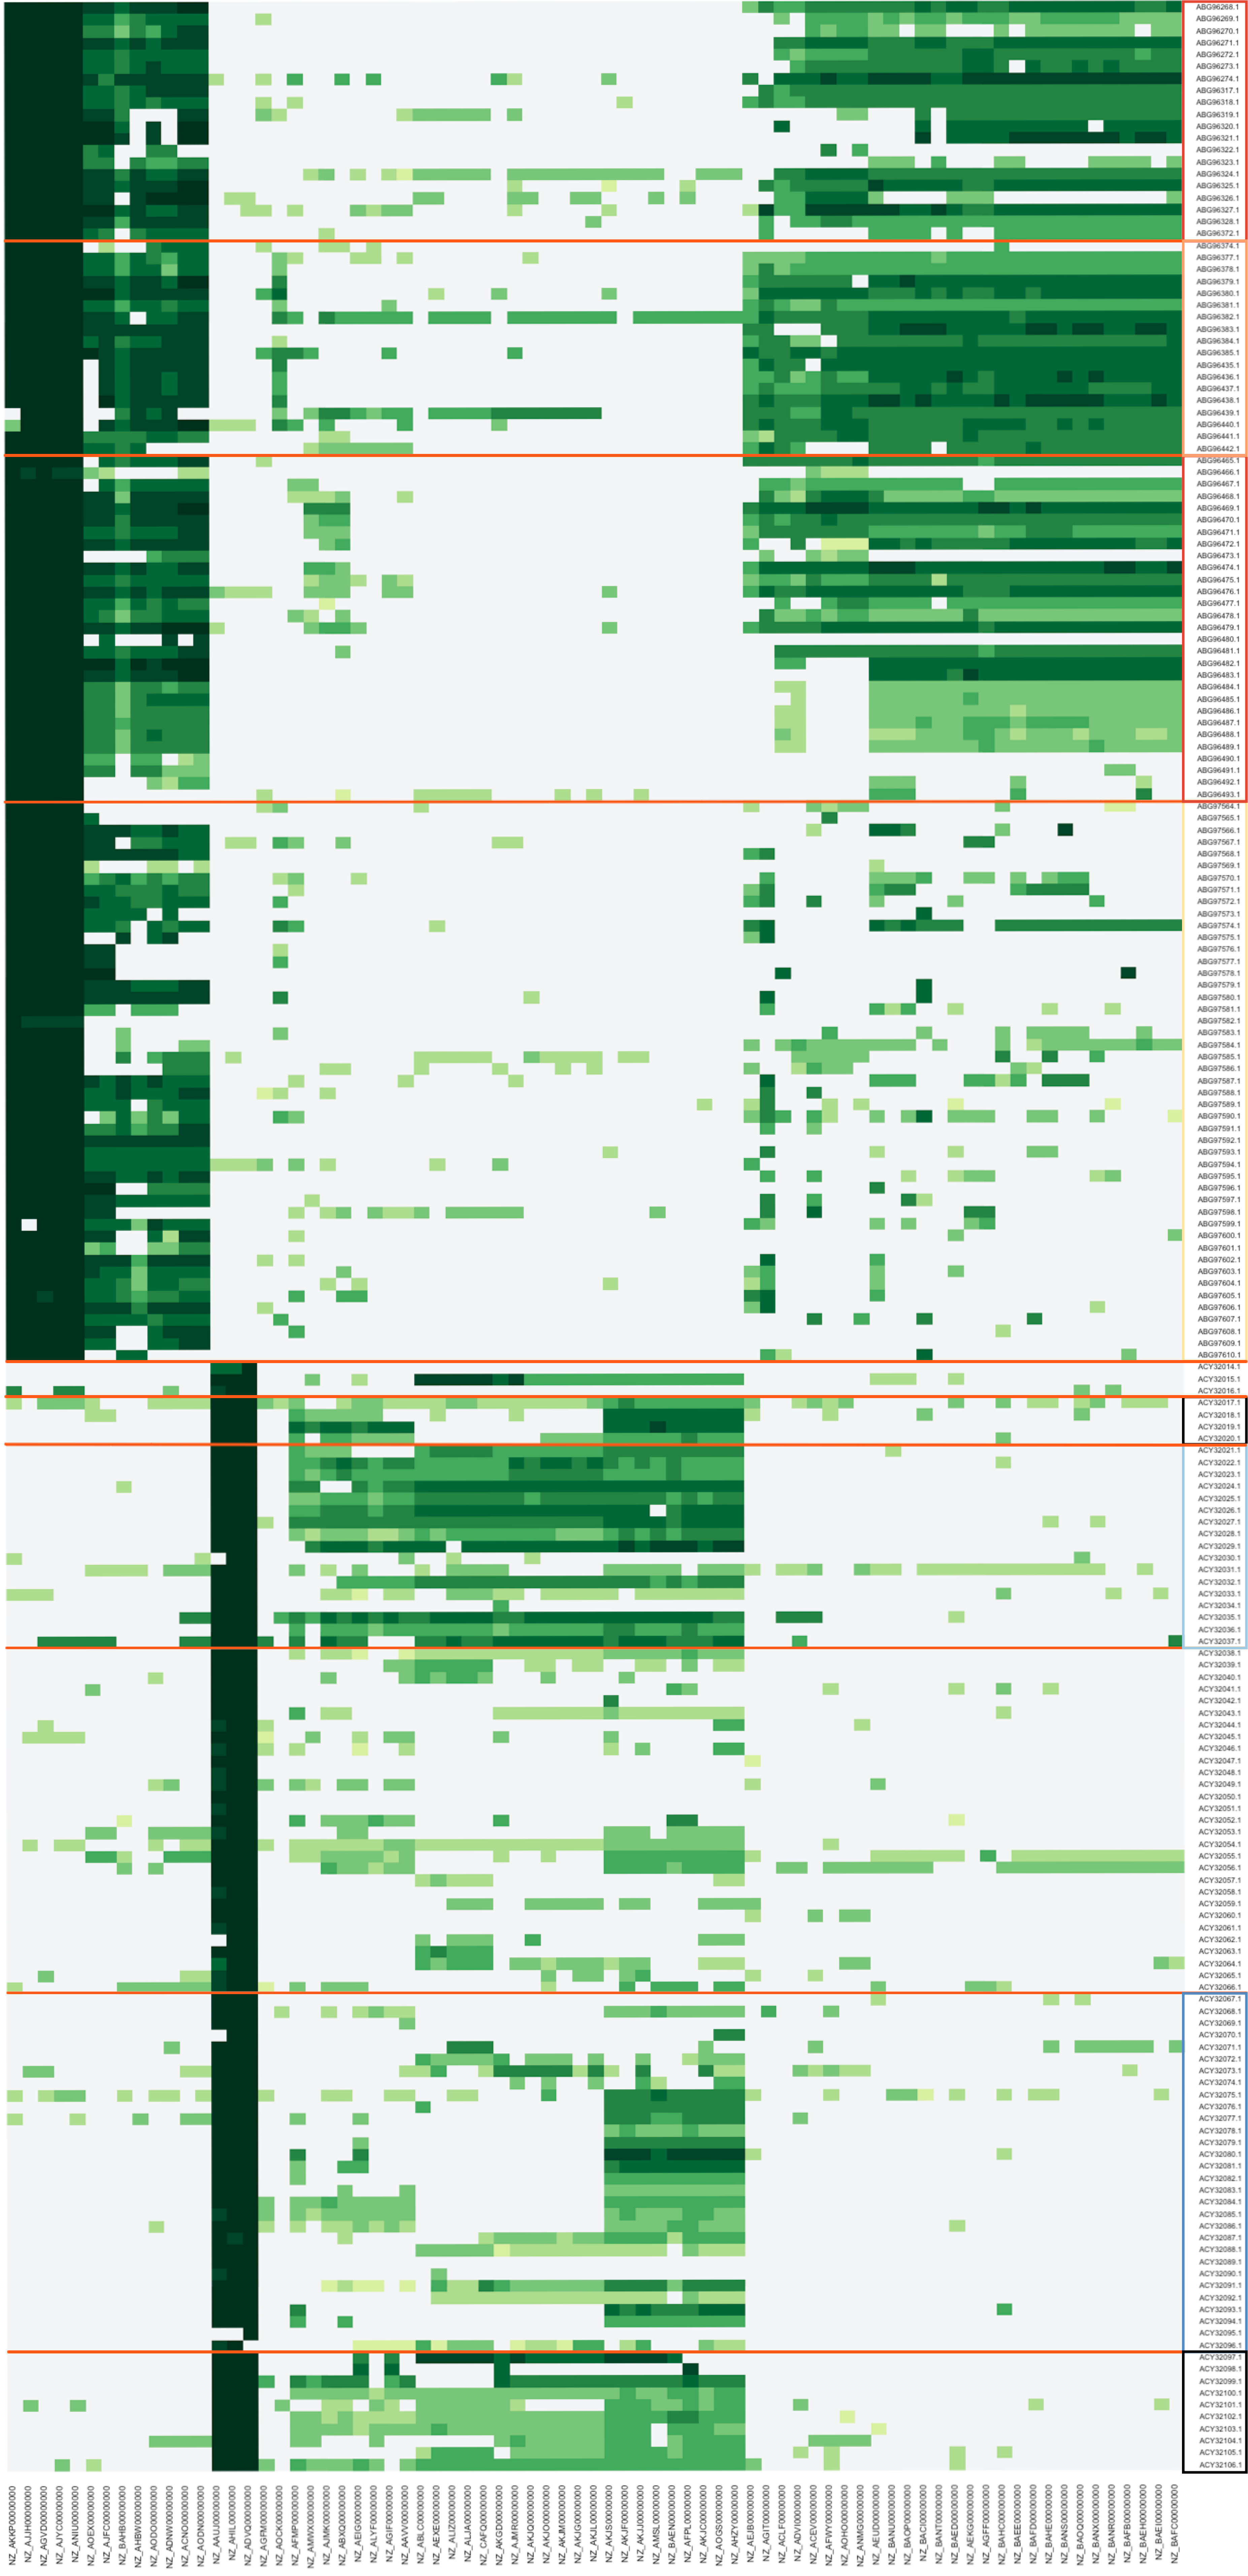

ABG96268.1  
 ABG96269.1  
 ABG96270.1  
 ABG96271.1  
 ABG96272.1  
 ABG96273.1  
 ABG96274.1  
 ABG96317.1  
 ABG96318.1  
 ABG96319.1  
 ABG96320.1  
 ABG96321.1  
 ABG96322.1  
 ABG96323.1  
 ABG96324.1  
 ABG96325.1  
 ABG96326.1  
 ABG96327.1  
 ABG96328.1  
 ABG96372.1  
 ABG96374.1  
 ABG96377.1  
 ABG96378.1  
 ABG96379.1  
 ABG96380.1  
 ABG96381.1  
 ABG96382.1  
 ABG96383.1  
 ABG96384.1  
 ABG96385.1  
 ABG96435.1  
 ABG96436.1  
 ABG96437.1  
 ABG96438.1  
 ABG96439.1  
 ABG96440.1  
 ABG96441.1  
 ABG96442.1  
 ABG96465.1  
 ABG96466.1  
 ABG96467.1  
 ABG96468.1  
 ABG96469.1  
 ABG96470.1  
 ABG96471.1  
 ABG96472.1  
 ABG96473.1  
 ABG96474.1  
 ABG96475.1  
 ABG96476.1  
 ABG96477.1  
 ABG96478.1  
 ABG96479.1  
 ABG96480.1  
 ABG96481.1  
 ABG96482.1  
 ABG96483.1  
 ABG96484.1  
 ABG96485.1  
 ABG96486.1  
 ABG96487.1  
 ABG96488.1  
 ABG96489.1  
 ABG96490.1  
 ABG96491.1  
 ABG96492.1  
 ABG96493.1  
 ABG97565.1  
 ABG97566.1  
 ABG97567.1  
 ABG97568.1  
 ABG97569.1  
 ABG97570.1  
 ABG97571.1  
 ABG97572.1  
 ABG97573.1  
 ABG97574.1  
 ABG97575.1  
 ABG97576.1  
 ABG97577.1  
 ABG97578.1  
 ABG97579.1  
 ABG97580.1  
 ABG97581.1  
 ABG97582.1  
 ABG97583.1  
 ABG97584.1  
 ABG97585.1  
 ABG97586.1  
 ABG97587.1  
 ABG97588.1  
 ABG97589.1  
 ABG97590.1  
 ABG97591.1  
 ABG97592.1  
 ABG97593.1  
 ABG97594.1  
 ABG97595.1  
 ABG97596.1  
 ABG97597.1  
 ABG97598.1  
 ABG97599.1  
 ABG97600.1  
 ABG97601.1  
 ABG97602.1  
 ABG97603.1  
 ABG97604.1  
 ABG97605.1  
 ABG97606.1  
 ABG97607.1  
 ABG97608.1  
 ABG97609.1  
 ABG97610.1  
 ACY32014.1  
 ACY32015.1  
 ACY32016.1  
 ACY32017.1  
 ACY32018.1  
 ACY32019.1  
 ACY32020.1  
 ACY32021.1  
 ACY32022.1  
 ACY32023.1  
 ACY32024.1  
 ACY32025.1  
 ACY32026.1  
 ACY32027.1  
 ACY32028.1  
 ACY32029.1  
 ACY32030.1  
 ACY32031.1  
 ACY32032.1  
 ACY32033.1  
 ACY32034.1  
 ACY32035.1  
 ACY32036.1  
 ACY32037.1  
 ACY32038.1  
 ACY32039.1  
 ACY32040.1  
 ACY32041.1  
 ACY32042.1  
 ACY32043.1  
 ACY32044.1  
 ACY32045.1  
 ACY32046.1  
 ACY32047.1  
 ACY32048.1  
 ACY32049.1  
 ACY32050.1  
 ACY32051.1  
 ACY32052.1  
 ACY32053.1  
 ACY32054.1  
 ACY32055.1  
 ACY32056.1  
 ACY32057.1  
 ACY32058.1  
 ACY32059.1  
 ACY32060.1  
 ACY32061.1  
 ACY32062.1  
 ACY32063.1  
 ACY32064.1  
 ACY32065.1  
 ACY32066.1  
 ACY32067.1  
 ACY32068.1  
 ACY32069.1  
 ACY32070.1  
 ACY32071.1  
 ACY32072.1  
 ACY32073.1  
 ACY32074.1  
 ACY32075.1  
 ACY32076.1  
 ACY32077.1  
 ACY32078.1  
 ACY32079.1  
 ACY32080.1  
 ACY32081.1  
 ACY32082.1  
 ACY32083.1  
 ACY32084.1  
 ACY32085.1  
 ACY32086.1  
 ACY32087.1  
 ACY32088.1  
 ACY32089.1  
 ACY32090.1  
 ACY32091.1  
 ACY32092.1  
 ACY32093.1  
 ACY32094.1  
 ACY32095.1  
 ACY32096.1  
 ACY32097.1  
 ACY32098.1  
 ACY32099.1  
 ACY32100.1  
 ACY32101.1  
 ACY32102.1  
 ACY32103.1  
 ACY32104.1  
 ACY32105.1

*Rhodococcus josii* Steroid-Degradation Proteins

*Comamonas testosteroni* Steroid-Degradation Proteins
