# Supplementary material for: Delineation of Steroid-Degrading Microorganisms through Comparative Genomic Analysis
Source: PubMed Central journal article supplement (PMC4810484; doi:10.1128/mbio.00166-16), 2016-03-08

**A) Growth of predicted steroid degrading bacteria on steroid substrates**

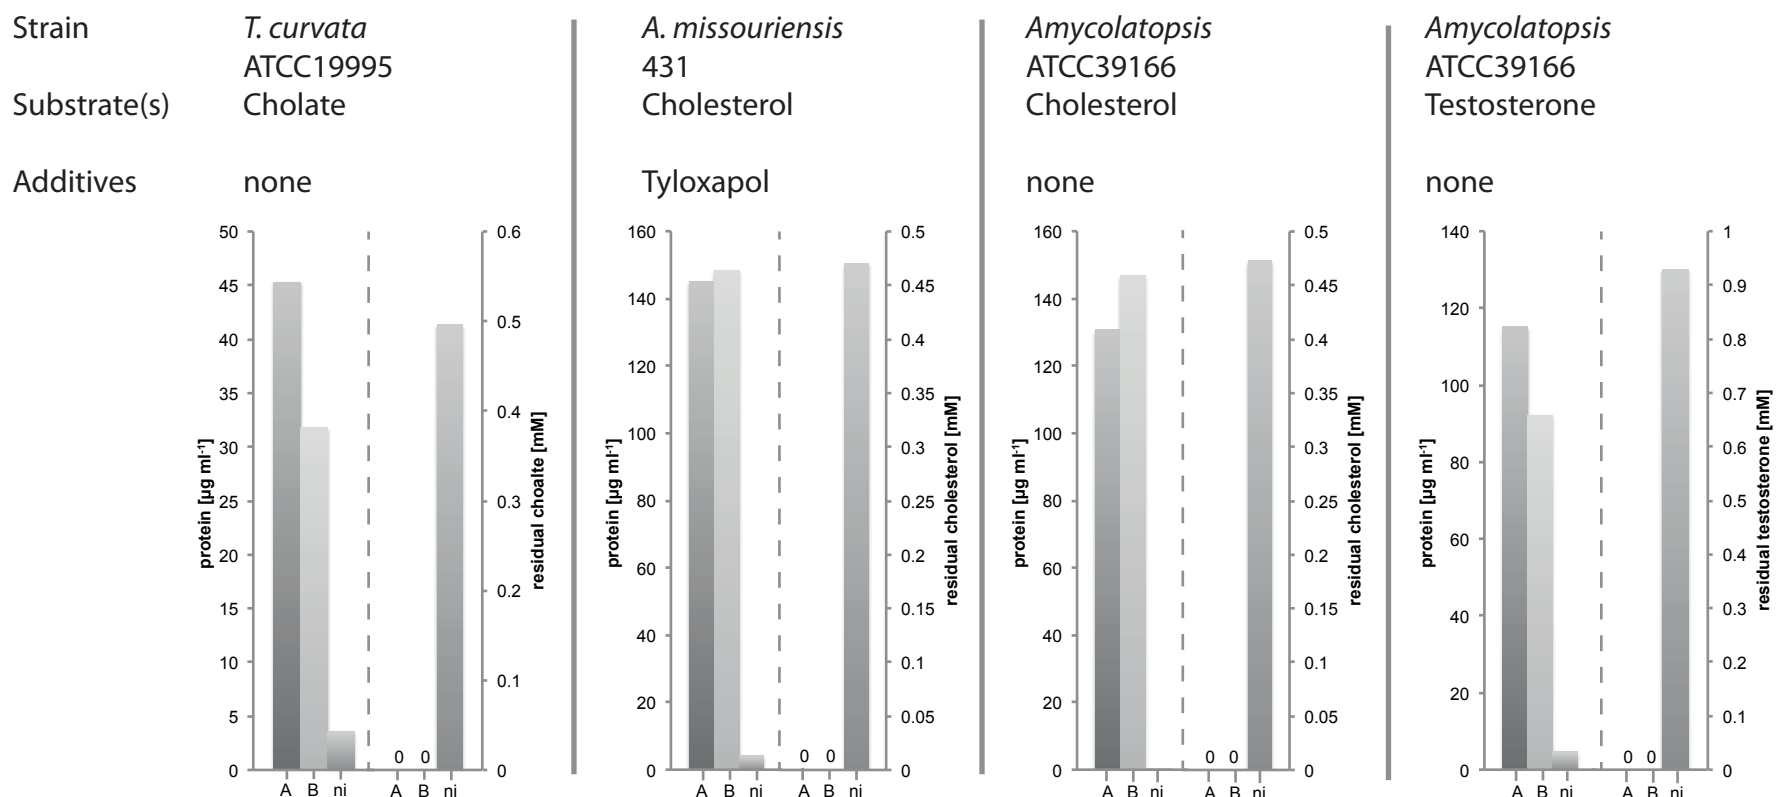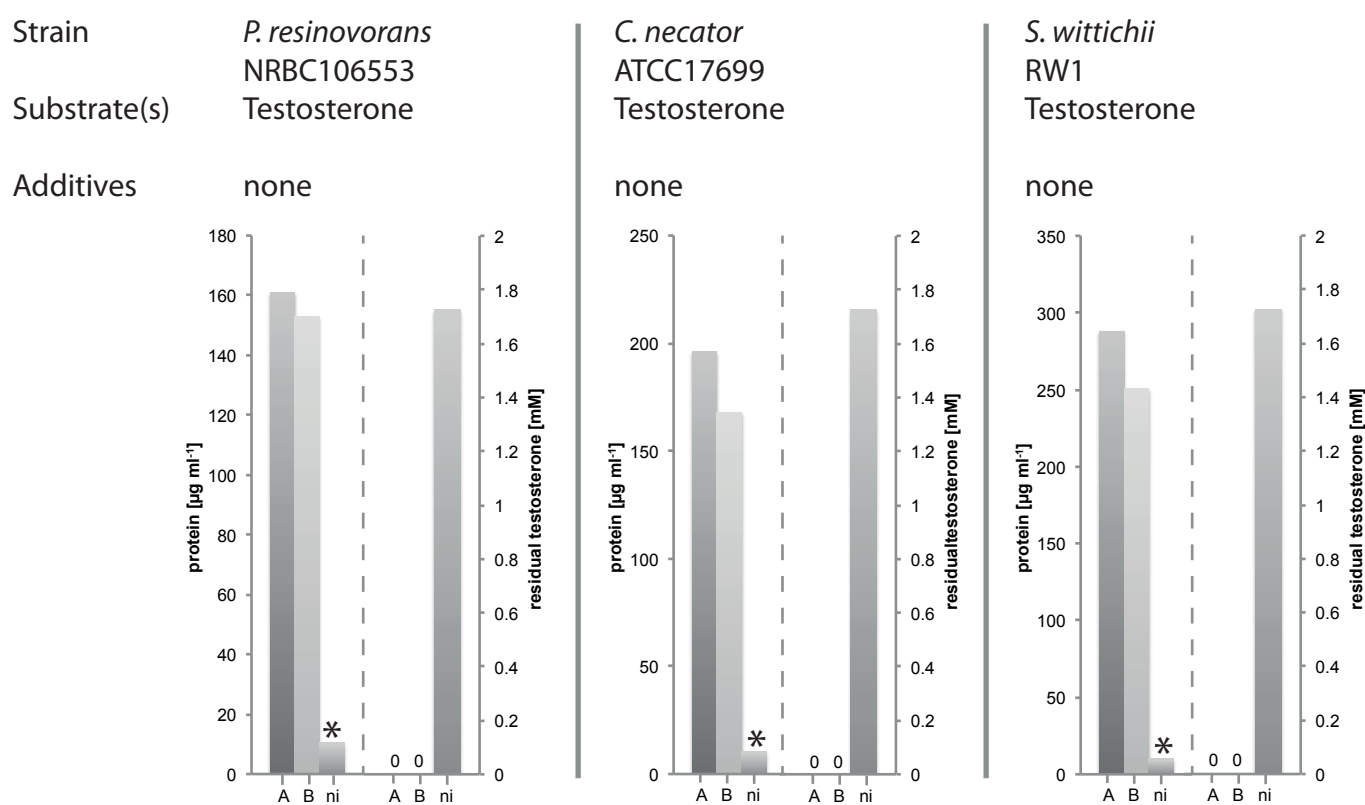

\* value derived from a non-inoculated LB culture containing testosterone

**B) Removal of steroid substrates by predicted steroid degrading bacteria**

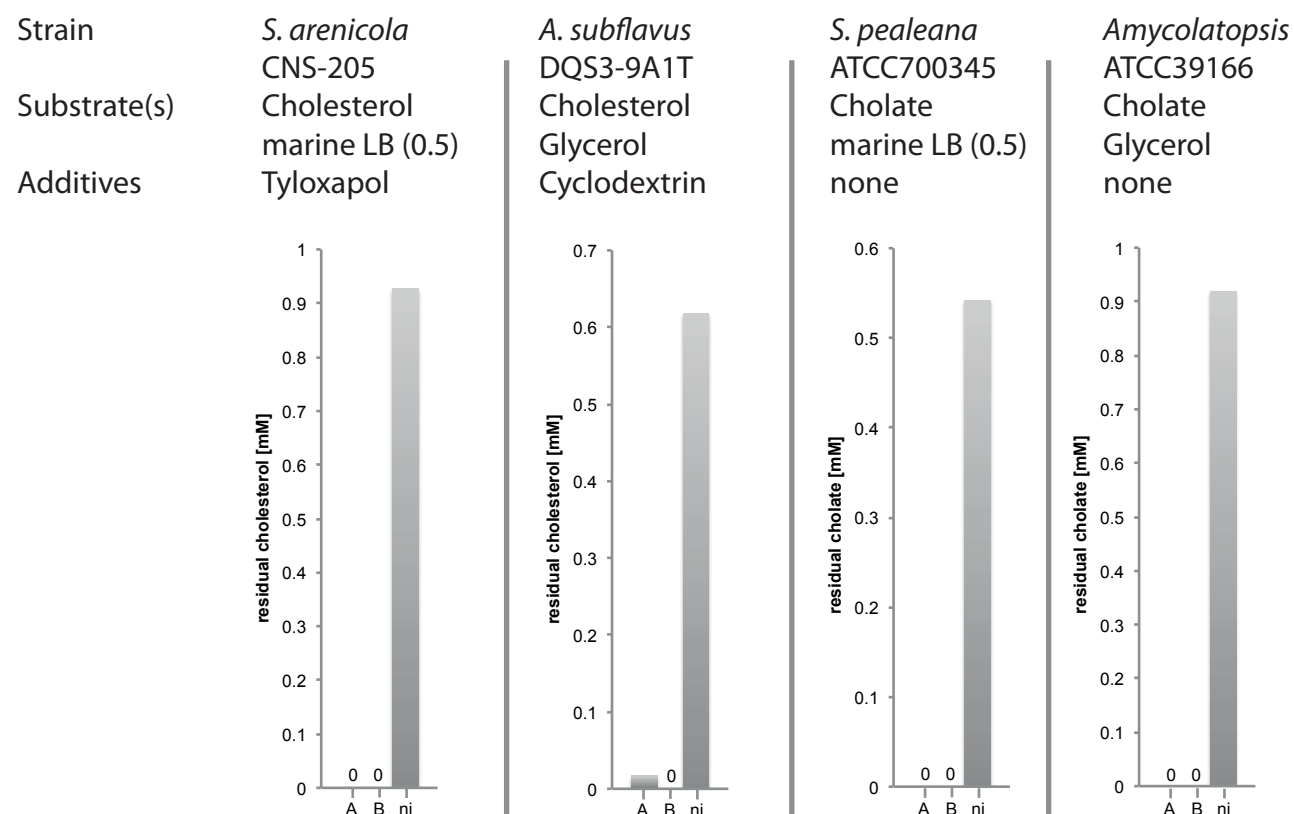

Supplement: mbo001162715sf4.pdf [file mbo001162715sf4.pdf]
